# Supplementary material
Source: PubMed Central journal article supplement (PMC7234914)
Supplement: NIHMS1562848-supplement-Supplementary_Tables.pdf [file NIHMS1562848-supplement-Supplementary_Tables.pdf]

**The U-shaped association between body mass index and gastric cancer risk in the *Helicobacter pylori* Biomarker Cohort Consortium: a nested case-control study from eight East Asian cohort studies**

Jieun Jang, Tianyi Wang, Hui Cai, Fei Ye, Gwen Murphy, Taichi Shimazu, Philip R Taylor, You-Lin Qiao, Keun-Young Yoo, Sun Ha Jee, Jeongseon Kim, Sheau-Chiann Chen, Christian C Abnet, Shoichiro Tsugane, Wei Zheng, Xiao-Ou Shu, Michael Pawlita, Sue K. Park, Meira Epplein

SUPPLEMENTARY TABLES

Table of Contents

|                                                                                                                                                                       |           |
|-----------------------------------------------------------------------------------------------------------------------------------------------------------------------|-----------|
| Supplementary Table 1. Characteristics of non-cardia gastric cancer cases and their matched controls with information on body mass index                              | .....p. 2 |
| Supplementary Table 2. The association of body mass index (BMI) and non-cardia gastric cancer risk, by various BMI categorization schemes                             | .....p. 3 |
| Supplementary Table 3. The association of body mass index (BMI) and non-cardia gastric cancer risk according to the time periods from BMI measurement to GC diagnosis | .....p. 4 |
| Supplementary Table 4. The association of body mass index and non-cardia gastric cancer risk by smoking status                                                        | .....p. 6 |
| Supplementary Table 5. The association of body mass index and non-cardia gastric cancer risk among those without missing education or dietary variables, respectively | .....p. 7 |

Supplementary Table 1. Characteristics of non-cardia gastric cancer cases and their matched controls with information on body mass index, the *H. pylori* Biomarker Cohort Consortium (HpBCC)

|                                   | Cases<br>(N=1,591)  | Controls<br>(N=1,953) |                        |
|-----------------------------------|---------------------|-----------------------|------------------------|
|                                   | <b>Median (IQR)</b> | <b>Median (IQR)</b>   | <b><i>P</i></b>        |
| Age, years                        | 58.5 (51.4, 64.8)   | 58.2 (49.9, 65.2)     | 0.26                   |
| BMI, kg/m <sup>2</sup>            | 22.9 (21.1, 25.5)   | 23.5 (21.5, 25.7)     | <0.01                  |
|                                   | <b><u>N (%)</u></b> | <b><u>N (%)</u></b>   | <b><u><i>P</i></u></b> |
| Gender                            |                     |                       |                        |
| Female                            | 683 (42.9)          | 971 (49.7)            | <0.01                  |
| Male                              | 908 (57.1)          | 982 (50.3)            |                        |
| Smoking                           |                     |                       |                        |
| Never smoker                      | 850(53.4)           | 1198(61.3)            | <0.01                  |
| Former smoker                     | 225(14.1)           | 264(13.5)             |                        |
| Current smoker                    | 516(32.4)           | 490(25.1)             |                        |
| Missing                           | 0 (0)               | 1 (0.1)               |                        |
| Education                         |                     |                       |                        |
| ≤Elementary school                | 606 (38.1)          | 697 (35.7)            | 0.09                   |
| Junior high school                | 290 (18.2)          | 418 (21.4)            |                        |
| High school                       | 273 (17.2)          | 347 (17.8)            |                        |
| ≥Professional education           | 209 (13.1)          | 285 (14.6)            |                        |
| Missing                           | 213 (13.4)          | 206 (10.5)            |                        |
| History of gastritis              |                     |                       |                        |
| Yes                               | 948 (59.6)          | 1230 (63.0)           | 0.30                   |
| No                                | 186 (11.7)          | 269 (13.8)            |                        |
| Missing                           | 457 (28.7)          | 454 (23.2)            |                        |
| <i>H. pylori</i> infection status |                     |                       |                        |
| Negative                          | 125 (7.9)           | 362 (18.5)            | <0.01                  |
| Positive                          | 1466 (92.1)         | 1591 (81.5)           |                        |
| <i>H. pylori</i> and CagA status  |                     |                       |                        |
| <i>H. pylori</i> -                | 125 (7.9)           | 362 (18.5)            | <0.01                  |
| <i>H. pylori</i> + and CagA-      | 75 (4.7)            | 117 (6.0)             |                        |
| <i>H. pylori</i> + and CagA+      | 1391 (87.4)         | 1474 (75.5)           |                        |
| Omp and HP0305 status             |                     |                       |                        |
| Omp- and HP0305-                  | 143 (9.0)           | 452 (23.1)            | <0.01                  |
| Omp+ or HP0305+                   | 403 (25.3)          | 564 (28.9)            |                        |
| Omp+ and HP0305+                  | 1045 (65.7)         | 937 (48.0)            |                        |

Abbreviations: IQR, interquartile range.

1. Chi-square test was done within those non-missing subjects.

Supplementary Table 2. The association of body mass index (BMI) and non-cardia gastric cancer risk, by various BMI categorization schemes, the *H. pylori* Biomarker Cohort Consortium (HpBCC)

| BMI (kg/m <sup>2</sup> )               | Cases<br>N (%) | Controls<br>N (%) | OR (95% CI) <sup>1</sup> | OR (95% CI) <sup>2</sup> |
|----------------------------------------|----------------|-------------------|--------------------------|--------------------------|
| < 18.5                                 | 60 (3.8)       | 55 (2.8)          | <b>1.54 (1.04-2.29)</b>  | <b>1.60 (1.07-2.40)</b>  |
| 18.5-22.9                              | 743 (46.7)     | 798 (40.9)        | <b>1.33 (1.12-1.59)</b>  | <b>1.33 (1.11-1.59)</b>  |
| 23.0-24.9                              | 329 (20.7)     | 489 (25.0)        | 1.00                     | 1.00                     |
| 25.0-29.9                              | 405 (25.5)     | 543 (27.8)        | 1.19 (0.98-1.44)         | 1.19 (0.98-1.45)         |
| ≥ 30.0                                 | 54 (3.4)       | 68 (3.5)          | <b>1.47 (1.00-2.18)</b>  | 1.46 (0.98-2.17)         |
| <b>Revised Asian cutpoint</b>          |                |                   |                          |                          |
| < 18.5                                 | 60 (3.8)       | 55 (2.8)          | <b>1.54 (1.04-2.29)</b>  | <b>1.60 (1.07-2.40)</b>  |
| 18.5-20.0                              | 141 (8.9)      | 140 (7.2)         | <b>1.43 (1.08-1.89)</b>  | <b>1.40 (1.05-1.85)</b>  |
| 20.0-22.9                              | 602 (37.8)     | 658 (33.7)        | <b>1.31 (1.09-1.58)</b>  | <b>1.32 (1.09-1.59)</b>  |
| 23.0-24.9                              | 329 (20.7)     | 489 (25.0)        | 1.00                     | 1.00                     |
| 25.0-27.9                              | 316 (19.9)     | 436 (22.3)        | 1.14 (0.93-1.40)         | 1.14 (0.92-1.40)         |
| 28.0-29.9                              | 89 (5.6)       | 107 (5.5)         | <b>1.39 (1.01-1.92)</b>  | <b>1.42 (1.02-1.96)</b>  |
| ≥ 30.0                                 | 54 (3.4)       | 68 (3.5)          | 1.48 (1.00-2.18)         | 1.46 (0.98-2.18)         |
| <b>Based on NEJM paper</b>             |                |                   |                          |                          |
| < 18.5                                 | 60 (3.8)       | 55 (2.8)          | <b>1.50 (1.01-2.22)</b>  | <b>1.55 (1.04-2.30)</b>  |
| 18.5-20.0                              | 156 (9.8)      | 159 (8.1)         | <b>1.35 (1.04-1.75)</b>  | <b>1.31 (1.01-1.71)</b>  |
| 20.1-22.5                              | 502 (31.6)     | 532 (27.2)        | <b>1.31 (1.11-1.57)</b>  | <b>1.29 (1.08-1.55)</b>  |
| 22.6-25.0                              | 422 (26.5)     | 612 (31.3)        | 1.00                     | 1.00                     |
| 25.1-27.5                              | 271 (17.0)     | 388 (19.9)        | 1.06 (0.87-1.30)         | 1.05 (0.85-1.29)         |
| 27.6-30.0                              | 128 (8.1)      | 142 (7.3)         | <b>1.48 (1.12-1.95)</b>  | <b>1.47 (1.11-1.94)</b>  |
| >30.0                                  | 52 (3.3)       | 65 (3.3)          | <b>1.45 (0.98-2.15)</b>  | <b>1.46 (0.98-2.17)</b>  |
| <b>Modified revised Asian cutpoint</b> |                |                   |                          |                          |
| < 18.5                                 | 60 (3.8)       | 55 (2.8)          | <b>1.54 (1.04-2.29)</b>  | <b>1.60 (1.07-2.40)</b>  |
| 18.5-22.9                              | 743 (46.7)     | 798 (40.9)        | <b>1.33 (1.12-1.59)</b>  | <b>1.33 (1.11-1.59)</b>  |
| 23.0-24.9                              | 329 (20.7)     | 489 (25.0)        | 1.00                     | 1.00                     |
| 25.0-27.9                              | 316 (19.9)     | 436 (22.3)        | 1.14 (0.93-1.40)         | 1.14 (0.92-1.40)         |
| ≥ 28.0                                 | 143 (9.0)      | 175 (9.0)         | <b>1.42 (1.09-1.86)</b>  | <b>1.43 (1.09-1.88)</b>  |

1. Conditional logistic regression stratified by cohort

2. Conditional logistic regression stratified by cohort, and adjusted for age, sex, smoking status, and *H. pylori* (dual Omp/HP0305 sero-positivity)

Supplementary Table 3. The association of body mass index (BMI) and non-cardia gastric cancer risk according to the time periods from BMI measurement to GC diagnosis, in the *H. pylori* Biomarker Cohort Consortium (HpBCC)

A. Diagnosed  $\geq 1$  year from BMI measurement

| BMI (kg/m <sup>2</sup> ) | Cases<br>N (%) | Controls<br>N (%) | OR (95% CI) <sup>1</sup> | OR (95% CI) <sup>2</sup> | OR (95% CI) <sup>3</sup> | OR (95% CI) <sup>4</sup> | OR (95% CI) <sup>5</sup> |
|--------------------------|----------------|-------------------|--------------------------|--------------------------|--------------------------|--------------------------|--------------------------|
| < 18.5                   | 37 (3.8)       | 30 (2.3)          | <b>1.92 (1.15, 2.21)</b> | <b>1.85 (1.11, 3.09)</b> | <b>2.13 (1.25, 3.65)</b> | <b>1.91 (1.13, 3.24)</b> | <b>1.93 (1.14, 3.27)</b> |
| 18.5-20.0                | 66 (6.8)       | 101 (7.7)         | 1.02 (0.72, 1.45)        | 1.00 (0.70, 1.42)        | 1.07 (0.74, 1.54)        | 1.06 (0.74, 1.52)        | 1.06 (0.74, 1.52)        |
| 20.1-22.5                | 284 (29.1)     | 296 (22.4)        | <b>1.54 (1.23, 1.93)</b> | <b>1.52 (1.22, 1.91)</b> | <b>1.53 (1.21, 1.94)</b> | <b>1.57 (1.24, 1.98)</b> | <b>1.56 (1.24, 1.97)</b> |
| 22.6-25.0                | 269 (27.5)     | 440 (33.3)        | 1.00 (reference)         |
| 25.1-27.5                | 178 (18.2)     | 286 (21.6)        | 1.08 (0.85, 1.38)        | 1.08 (0.85, 1.38)        | 1.09 (0.84, 1.40)        | 1.08 (0.84, 1.39)        | 1.08 (0.84, 1.39)        |
| >27.5                    | 143 (14.6)     | 168 (12.7)        | <b>1.67 (1.26, 2.20)</b> | <b>1.64 (1.24, 2.17)</b> | <b>1.69 (1.27, 2.26)</b> | <b>1.63 (1.23, 2.17)</b> | <b>1.62 (1.22, 2.15)</b> |

B. Diagnosed  $\geq 2$  years from BMI measurement

| BMI (kg/m <sup>2</sup> ) | Cases<br>N (%) | Controls<br>N (%) | OR (95% CI) <sup>1</sup> | OR (95% CI) <sup>2</sup> | OR (95% CI) <sup>3</sup> | OR (95% CI) <sup>4</sup> | OR (95% CI) <sup>5</sup> |
|--------------------------|----------------|-------------------|--------------------------|--------------------------|--------------------------|--------------------------|--------------------------|
| < 18.5                   | 35 (3.9)       | 30 (2.4)          | <b>1.83 (1.09, 3.08)</b> | <b>1.77 (1.05, 2.99)</b> | <b>2.08 (1.21, 3.60)</b> | <b>1.83 (1.07, 3.12)</b> | <b>1.85 (1.08, 3.16)</b> |
| 18.5-20.0                | 61 (6.8)       | 93 (7.6)          | 1.04 (0.72, 1.49)        | 1.01 (0.70, 1.46)        | 1.07 (0.73, 1.57)        | 1.07 (0.74, 1.55)        | 1.07 (0.73, 1.55)        |
| 20.1-22.5                | 258 (28.8)     | 279 (22.7)        | <b>1.50 (1.19, 1.90)</b> | <b>1.48 (1.17, 1.88)</b> | <b>1.50 (1.18, 1.92)</b> | <b>1.52 (1.20, 1.94)</b> | <b>1.51 (1.19, 1.93)</b> |
| 22.6-25.0                | 247 (27.5)     | 410 (33.4)        | 1.00 (reference)         |
| 25.1-27.5                | 165 (18.4)     | 261 (21.3)        | 1.12 (0.87, 1.45)        | 1.07 (0.76, 1.50)        | 1.11 (0.85, 1.45)        | 1.11 (0.86, 1.45)        | 1.11 (0.86, 1.44)        |
| >27.5                    | 131 (14.6)     | 155 (12.6)        | <b>1.69 (1.26, 2.26)</b> | <b>1.46 (1.10, 1.93)</b> | <b>1.72 (1.27, 2.33)</b> | <b>1.65 (1.23, 2.22)</b> | <b>1.63 (1.22, 2.20)</b> |

C. Diagnosed  $\geq 3$  years from BMI measurement

| BMI (kg/m <sup>2</sup> ) | Cases<br>N (%) | Controls<br>N (%) | OR (95% CI) <sup>1</sup> | OR (95% CI) <sup>2</sup> | OR (95% CI) <sup>3</sup> | OR (95% CI) <sup>4</sup> | OR (95% CI) <sup>5</sup> |
|--------------------------|----------------|-------------------|--------------------------|--------------------------|--------------------------|--------------------------|--------------------------|
| < 18.5                   | 29 (3.7)       | 27 (2.5)          | 1.72 (0.99, 3.01)        | 1.64 (0.93, 2.87)        | <b>1.86 (1.04, 3.34)</b> | 1.56 (0.89, 2.76)        | 1.59 (0.90, 2.81)        |
| 18.5-20.0                | 55 (7.0)       | 82 (7.5)          | 1.07 (0.73, 1.58)        | 1.04 (0.71, 1.54)        | 1.07 (0.71, 1.59)        | 1.07 (0.72, 1.60)        | 1.07 (0.72, 1.59)        |
| 20.1-22.5                | 225 (28.7)     | 237 (21.8)        | <b>1.57 (1.22, 2.03)</b> | <b>1.56 (1.21, 2.01)</b> | <b>1.57 (1.21, 2.04)</b> | <b>1.60 (1.24, 2.08)</b> | <b>1.59 (1.23, 2.06)</b> |
| 22.6-25.0                | 215 (27.4)     | 361 (33.2)        | 1.00 (reference)         |
| 25.1-27.5                | 143 (18.3)     | 234 (21.5)        | 1.11 (0.85, 1.46)        | 1.11 (0.84, 1.46)        | 1.08 (0.81, 1.43)        | 1.08 (0.82, 1.42)        | 1.07 (0.81, 1.42)        |
| >27.5                    | 117 (14.9)     | 147 (13.5)        | <b>1.62 (1.19, 2.20)</b> | <b>1.60 (1.17, 2.17)</b> | <b>1.63 (1.19, 2.24)</b> | <b>1.57 (1.15, 2.14)</b> | <b>1.56 (1.14, 2.13)</b> |

D. Diagnosed  $\geq 5$  years from BMI measurement

| BMI (kg/m <sup>2</sup> ) | Cases<br>N (%) | Controls<br>N (%) | OR (95% CI) <sup>1</sup> | OR (95% CI) <sup>2</sup> | OR (95% CI) <sup>3</sup> | OR (95% CI) <sup>4</sup> | OR (95% CI) <sup>5</sup> |
|--------------------------|----------------|-------------------|--------------------------|--------------------------|--------------------------|--------------------------|--------------------------|
| < 18.5                   | 19 (3.2)       | 23 (2.7)          | 1.37 (0.72, 2.63)        | 1.27 (0.66, 2.45)        | 1.47 (0.75, 2.89)        | 1.22 (0.63, 2.37)        | 1.23 (0.63, 2.38)        |

|           |            |            |                          |                          |                          |                          |                          |
|-----------|------------|------------|--------------------------|--------------------------|--------------------------|--------------------------|--------------------------|
| 18.5-20.0 | 43 (7.3)   | 64 (7.5)   | 1.13 (0.73, 1.75)        | 1.09 (0.70, 1.70)        | 1.12 (0.71, 1.77)        | 1.13 (0.72, 1.77)        | 1.14 (0.73, 1.78)        |
| 20.1-22.5 | 174 (29.5) | 183 (21.5) | <b>1.65 (1.23, 2.21)</b> | <b>1.62 (1.21, 2.17)</b> | <b>1.66 (1.23, 2.24)</b> | <b>1.68 (1.25, 2.26)</b> | <b>1.67 (1.24, 2.25)</b> |
| 22.6-25.0 | 153 (26.0) | 272 (32.0) | 1.00 (reference)         |
| 25.1-27.5 | 113 (19.2) | 192 (22.6) | 1.13 (0.83, 1.54)        | 1.12 (0.82, 1.53)        | 1.11 (0.81, 1.54)        | 1.10 (0.80, 1.51)        | 1.11 (0.81, 1.52)        |
| >27.5     | 87 (14.8)  | 116 (13.7) | <b>1.58 (1.12, 2.25)</b> | <b>1.54 (1.08, 2.19)</b> | <b>1.59 (1.10, 2.28)</b> | <b>1.54 (1.08, 2.20)</b> | <b>1.53 (1.07, 2.19)</b> |

1. Conditional logistic regression stratified by cohort

2. Conditional logistic regression stratified by cohort, and additionally adjusted for age, sex, smoking status

3. Conditional logistic regression stratified by cohort, and additionally adjusted for age, sex, smoking status, and dual Omp/HP0305 sero-positivity

4. Conditional logistic regression stratified by cohort, and additionally adjusted for age, sex, smoking status, and *H. pylori* infection (+ vs. -)

5. Conditional logistic regression stratified by cohort, and additionally adjusted for age, sex, smoking status, and *H. pylori* and CagA status (HP-, HP+CagA-, and HP+CagA+)

Supplementary Table 4. The association of body mass index and non-cardia gastric cancer risk by smoking status, the *H. pylori* Biomarker Cohort Consortium (HpBCC)

| BMI (kg/m <sup>2</sup> ) | Never smokers      |                          | Ever smokers       |                          | Never smokers      |                          | Former smokers     |                          | Current smokers    |                          |
|--------------------------|--------------------|--------------------------|--------------------|--------------------------|--------------------|--------------------------|--------------------|--------------------------|--------------------|--------------------------|
|                          | Ca/Co <sup>1</sup> | OR (95% CI) <sup>2</sup> |
| < 18.5                   | 29/26              | <b>1.80 (1.02, 3.17)</b> | 30/25              | 1.32 (0.74, 2.35)        | 29/26              | <b>1.80 (1.02, 3.17)</b> | 7/6                | 1.83 (0.56, 6.02)        | 23/19              | 1.16 (0.59, 2.27)        |
| 18.5-20.0                | 74/91              | 1.37 (0.95, 1.97)        | 71/62              | 1.24 (0.82, 1.86)        | 74/91              | 1.37 (0.95, 1.97)        | 7/14               | 0.72 (0.27, 1.91)        | 64/48              | 1.30 (0.81, 2.07)        |
| 20.1-22.5                | 255/280            | <b>1.59 (1.24, 2.05)</b> | 222/216            | 1.16 (0.87, 1.54)        | 255/280            | <b>1.59 (1.24, 2.05)</b> | 37/53              | 0.94 (0.54, 1.62)        | 185/163            | 1.19 (0.84, 1.67)        |
| 22.6-25.0                | 187/358            | 1.00 (reference)         | 181/199            | 1.00 (reference)         | 187/358            | 1.00 (reference)         | 63/79              | 1.00 (reference)         | 118/120            | 1.00 (reference)         |
| 25.1-27.5                | 130/218            | 1.18 (0.89, 1.57)        | 85/122             | 0.80 (0.57, 1.14)        | 130/218            | 1.18 (0.89, 1.57)        | 39/47              | 1.10 (0.64, 1.90)        | 46/75              | 0.64 (0.41, 1.01)        |
| >27.5                    | 104/146            | <b>1.50 (1.10, 2.06)</b> | 62/49              | <b>1.56 (1.01, 2.44)</b> | 104/146            | <b>1.50 (1.10, 2.06)</b> | 27/16              | <b>2.51 (1.20, 5.23)</b> | 35/33              | 1.19 (0.68, 2.10)        |

1. N of cases / N of controls

2. Conditional logistic regression stratified by cohort and adjusted for age and sex

Supplementary Table 5. The association of body mass index and non-cardia gastric cancer risk among those without missing education or dietary variables, respectively, the *H. pylori* Biomarker Cohort Consortium (HpBCC)

A. Among those without missing value in education (without KNCC)

| BMI (kg/m <sup>2</sup> ) | Cases<br>N (%) | Controls<br>N (%) | OR (95% CI) <sup>1</sup> | OR (95% CI) <sup>2</sup> | OR (95% CI) <sup>3</sup> | OR (95% CI) <sup>4</sup> |
|--------------------------|----------------|-------------------|--------------------------|--------------------------|--------------------------|--------------------------|
| < 18.5                   | 45 (3.7)       | 45 (2.9)          | 1.49 (0.95, 2.32)        | 1.42 (0.91, 2.21)        | 1.55 (0.98, 2.46)        | 1.54 (0.97, 2.45)        |
| 18.5-20.0                | 124 (10.1)     | 133 (8.4)         | <b>1.38 (1.03, 1.85)</b> | <b>1.33 (1.00, 1.79)</b> | 1.32 (0.98, 1.79)        | 1.33 (0.98, 1.79)        |
| 20.1-22.5                | 411 (33.5)     | 433 (27.3)        | <b>1.42 (1.16, 1.74)</b> | <b>1.40 (1.14, 1.72)</b> | <b>1.39 (1.13, 1.71)</b> | <b>1.39 (1.13, 1.72)</b> |
| 22.6-25.0                | 305 (24.9)     | 489 (30.8)        | 1.00 (reference)         | 1.00 (reference)         | 1.00 (reference)         | 1.00 (reference)         |
| 25.1-27.5                | 188 (15.3)     | 308 (19.4)        | 1.04 (0.82, 1.31)        | 1.01 (0.80, 1.28)        | 1.00 (0.79, 1.28)        | 1.01 (0.79, 1.28)        |
| >27.5                    | 153 (12.5)     | 178 (11.2)        | <b>1.63 (1.25, 2.13)</b> | <b>1.57 (1.20, 2.05)</b> | <b>1.62 (1.23, 2.13)</b> | <b>1.62 (1.23, 2.13)</b> |

B. Among those without missing value in total energy intake and fruit intake (without KNCC)

| BMI (kg/m <sup>2</sup> ) | Cases<br>N (%) | Controls<br>N (%) | OR (95% CI) <sup>1</sup> | OR (95% CI) <sup>5</sup> | OR (95% CI) <sup>6</sup> | OR (95% CI) <sup>7</sup> |
|--------------------------|----------------|-------------------|--------------------------|--------------------------|--------------------------|--------------------------|
| < 18.5                   | 35 (4.1)       | 23 (1.9)          | <b>2.21 (1.18, 4.17)</b> | <b>2.15 (1.14, 4.06)</b> | <b>2.10 (1.09, 4.05)</b> | <b>2.10 (1.09, 4.07)</b> |
| 18.5-20.0                | 57 (6.8)       | 84 (7.0)          | 1.38 (0.94, 2.02)        | 1.37 (0.93, 2.02)        | 1.27 (0.85, 1.90)        | 1.27 (0.85, 1.89)        |
| 20.1-22.5                | 240 (28.4)     | 260 (21.8)        | 0.88 (0.60, 1.28)        | 0.88 (0.60, 1.29)        | 0.86 (0.58, 1.28)        | 0.85 (0.57, 1.27)        |
| 22.6-25.0                | 228 (27.0)     | 399 (33.4)        | 1.00 (reference)         | 1.00 (reference)         | 1.00 (reference)         | 1.00 (reference)         |
| 25.1-27.5                | 155 (18.3)     | 264 (22.1)        | 0.95 (0.64, 1.42)        | 0.96 (0.64, 1.43)        | 0.90 (0.59, 1.36)        | 0.89 (0.59, 1.35)        |
| >27.5                    | 130 (15.4)     | 165 (13.8)        | 1.42 (0.94, 2.16)        | 1.40 (0.92, 2.14)        | 1.35 (0.87, 2.09)        | 1.34 (0.87, 2.08)        |

1. Conditional logistic regression stratified by cohort (within those without missing values of smoking).
2. Conditional logistic regression stratified by cohort, and additionally adjusted for age, sex, smoking status (within those without missing values of smoking).
3. Conditional logistic regression stratified by cohort, and additionally adjusted for age, sex, smoking status, and dual Omp/HP0305 sero-positivity (within those without missing values of smoking).
4. Conditional logistic regression stratified by cohort, and additionally adjusted for age, sex, smoking status, **education**, and dual Omp/HP0305 sero-positivity (within those without missing values of smoking).
5. Conditional logistic regression stratified by cohort, and additionally adjusted for age, sex, smoking status, and **total energy intake** (within those without missing values of smoking).
6. Conditional logistic regression stratified by cohort, and additionally adjusted for age, sex, smoking status, **total energy intake**, and dual Omp/HP0305 sero-positivity (within those without missing values of smoking).
7. Conditional logistic regression stratified by cohort, and additionally adjusted for age, sex, smoking status, **total energy intake**, fruit intake, and dual Omp/HP0305 sero-positivity (within those without missing values of smoking).
